# Supplementary material for: Modelling the role of livestock grazing in C and N cycling in grasslands with LPJmL5.0-grazing
Source: Copernicus journal article supplement (doi:10.5194/gmd-16-2455-2023), 2023-05-09
Supplement: Supplementary file 1 [file gmd-16-2455-2023-supplement.zip]

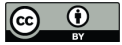

*Supplement of*

## **Modelling the role of livestock grazing in C and N cycling in grasslands with LPJmL5.0-grazing**

**Jens Heinke et al.**

*Correspondence to:* Jens Heinke ([heinke@pik-potsdam.de](mailto:heinke@pik-potsdam.de))

- [gmd-16-2455-2023-supplement-title-page.pdf](#)
- [livestock\\_module.R](#)

The copyright of individual parts of the supplement might differ from the article licence.
