# Supplementary material for: Modelling the role of livestock grazing in C and N cycling in grasslands with LPJmL5.0-grazing
Source: Copernicus journal article supplement (doi:10.5194/gmd-16-2455-2023), 2023-05-09
Supplement: Supplementary file 2 [file gmd-16-2455-2023-supplement.zip]

Archive with 2 entries (2 files):
- livestock_module.R
- gmd-16-2455-2023-supplement-title-page.pdf
